# Supplementary material
Source: PubMed Central journal article supplement (PMC7015337)
Supplement: rspb20192549supp5.pdf [file rspb20192549supp5.pdf]

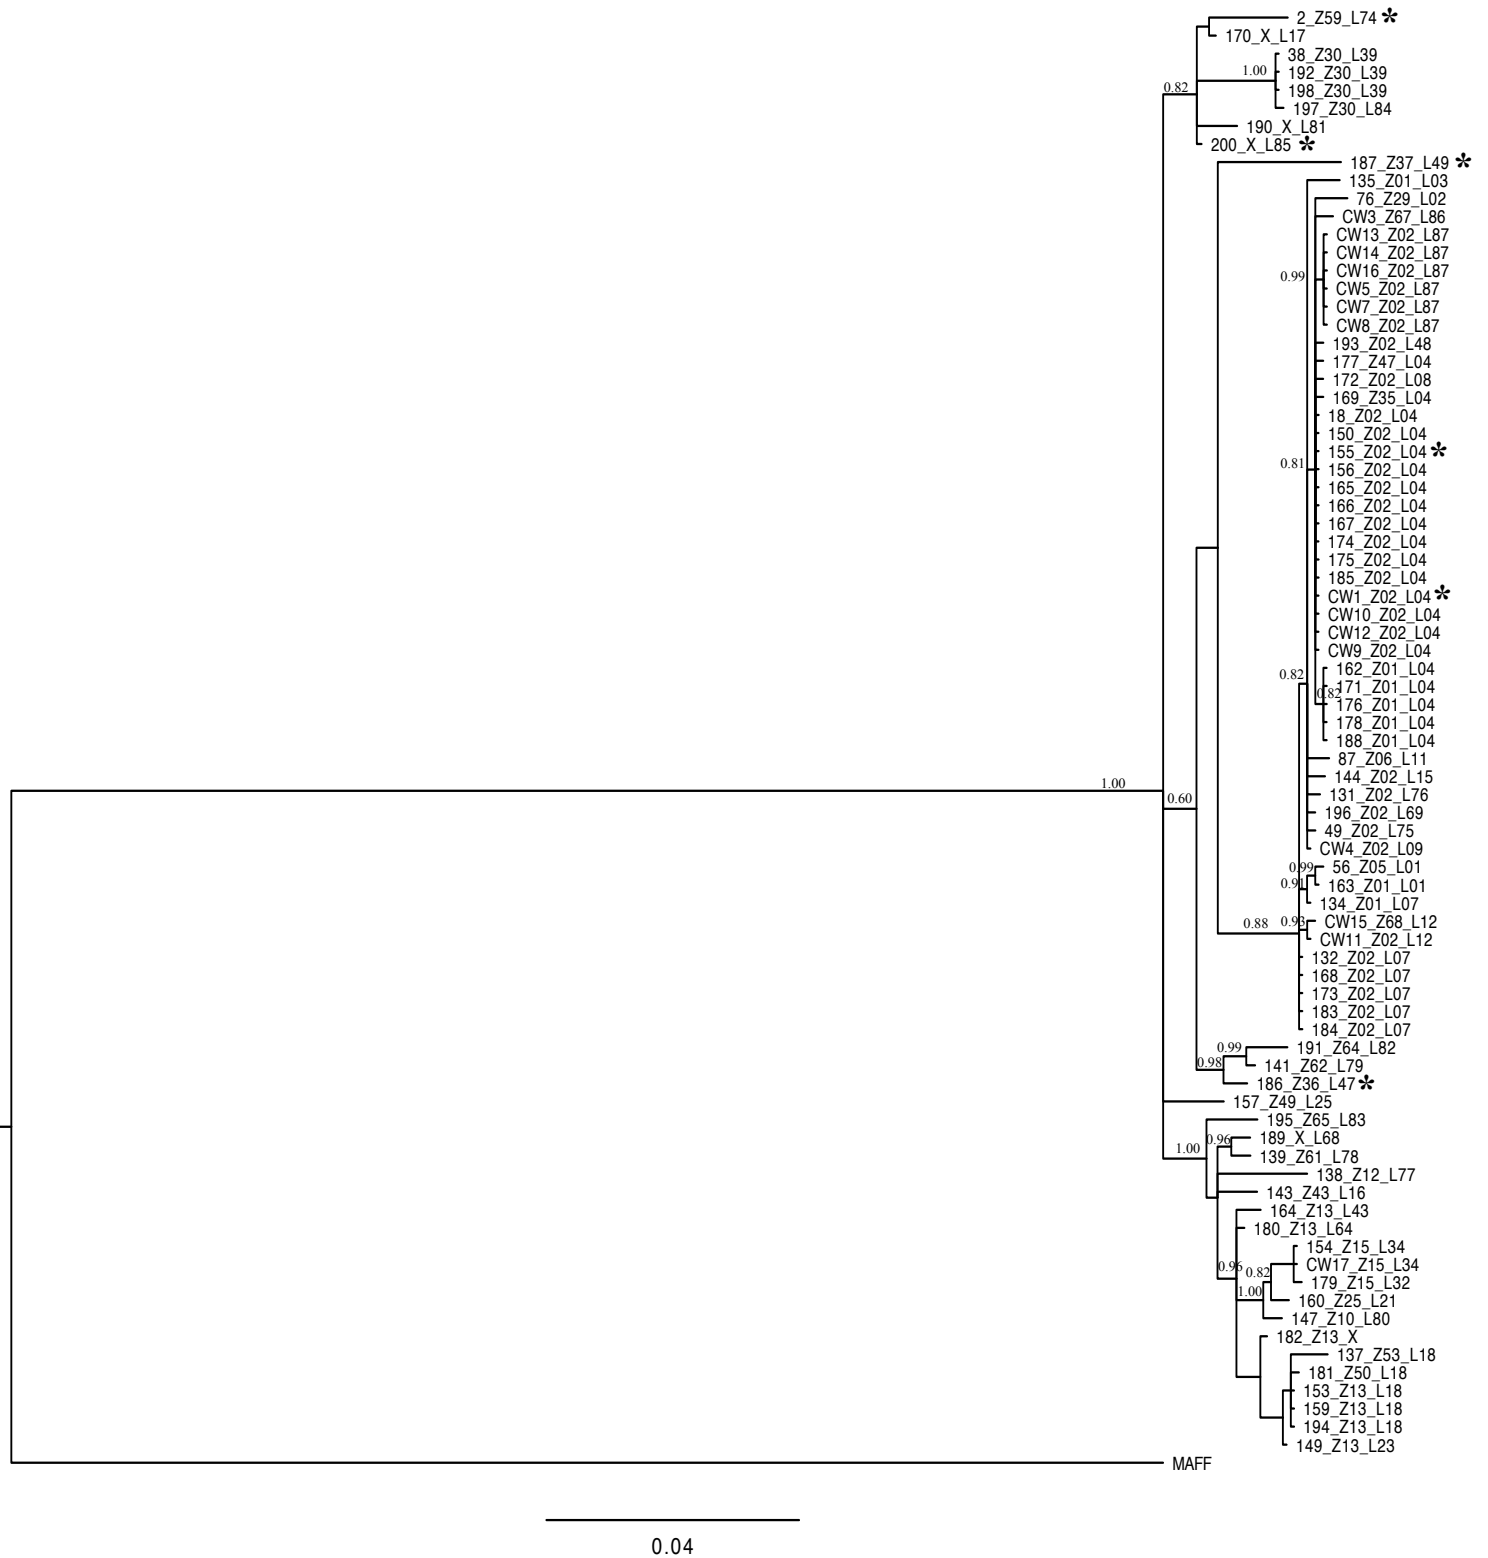

**S5 Figure** Bayesian SI phylogram of inoculated *Bradyrhizobium* isolates reconstructed with concatenated *nodZ*+*noIL* and rooted with homologous sequences from *Mesorhizobium loti* MAFF. Bayesian clade support values (posterior probabilities) are reported for all well-supported clades (pp  $\geq 0.80$ ). Ineffective isolates are noted with an asterisk. Non-nodulating isolates are not on the tree since they are lacking in homologous *nodZ* and *noIL* loci.
