# Supplementary material
Source: PubMed Central journal article supplement (PMC7015337)
Supplement: rspb20192549supp11.pdf [file rspb20192549supp11.pdf]

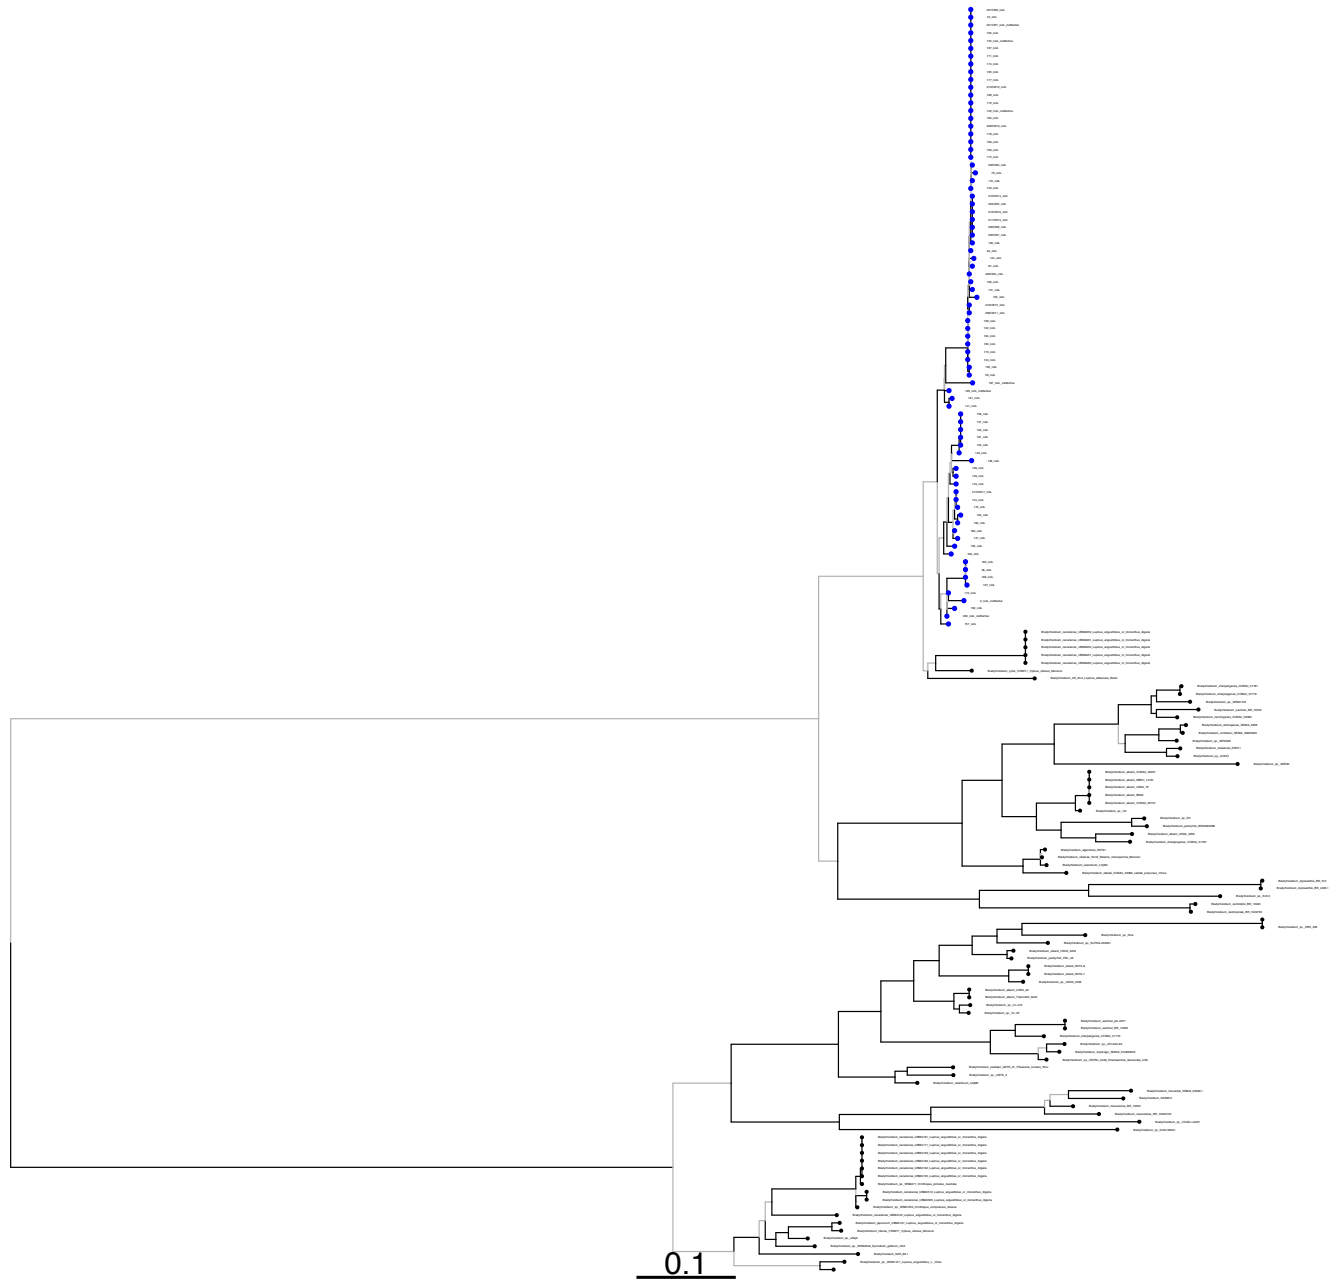

**Figure S11.** nOL phylogeny including isolates from *A. strigosus* and homologous *Bradyrhizobium* sequences from the NCBI refseq\_genomic database. Tips labeled in blue are isolates from our study and the remainder are from the NCBI database. The black branches are those that have bootstrap scores >95% and SH-aLRT >= 80%. Branches colored grey have values outside of one or both of these criteria and are of less confidence.
